# Supplementary material
Source: Springer Nature journal article supplement (https://www.springermedizin.de/resource/supplementary/12889_2007_998_MOESM2_ESM.pdf/9502786)

No of deaths per ICD-10 chapters

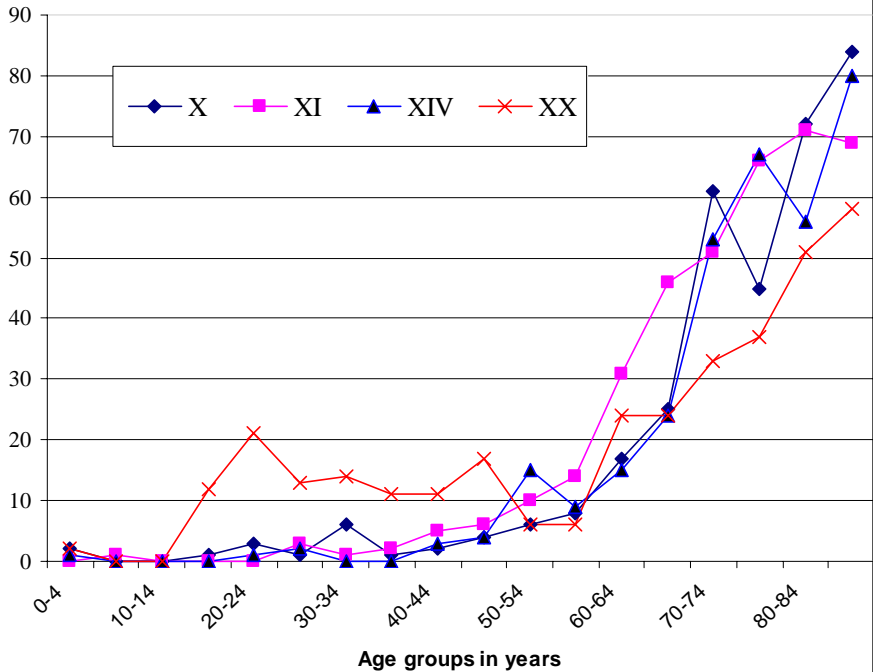

Supplement: MOESM2 [file 9502786]
